# Supplementary material
Source: publisher figshare collection journal article supplement (https://acs.figshare.com/ndownloader/files/25946458)
Supplement: Supplementary file 1 [file 25946458]

# **Improved Stability and Targeting Cytotoxicity of Epigallocatechin-3-Gallate Palmitate for Anticancer Therapy**

Xuerui Chen,<sup>#,1,2</sup> Bingbing Liu,<sup>#,1</sup> Rongliang Tong,<sup>3</sup> Shiping Ding,<sup>4</sup> Jian Wu,<sup>3</sup> Qunfang Lei<sup>\*,1</sup> Wenjun Fang<sup>\*,1</sup>

1. *Department of Chemistry, Zhejiang University, Hangzhou 310027, China*

2. *School of Medicine, Shanghai University, Shanghai 200444, China*

3. *Division of Hepatobiliary and Pancreatic Surgery, Department of Surgery, First Affiliated Hospital, School of Medicine, Zhejiang University, Hangzhou 310003, China.*

4. *The National Education Base for Basic Medical Sciences, Zhejiang University School of Medicine, Zhejiang University, Hangzhou 310058, China*

<sup>#</sup> Contributed equally as first authors.

## ***Corresponding Author***

*E-mail: fwjun@zju.edu.cn (WenJun Fang). Telephone: +86 571 88981416. Fax: +86-571-88981416.*

*E-mail: qflei@zju.edu.cn (QunFang Lei). Telephone: +86 571 88208913. Fax: +86-571-88208913.*

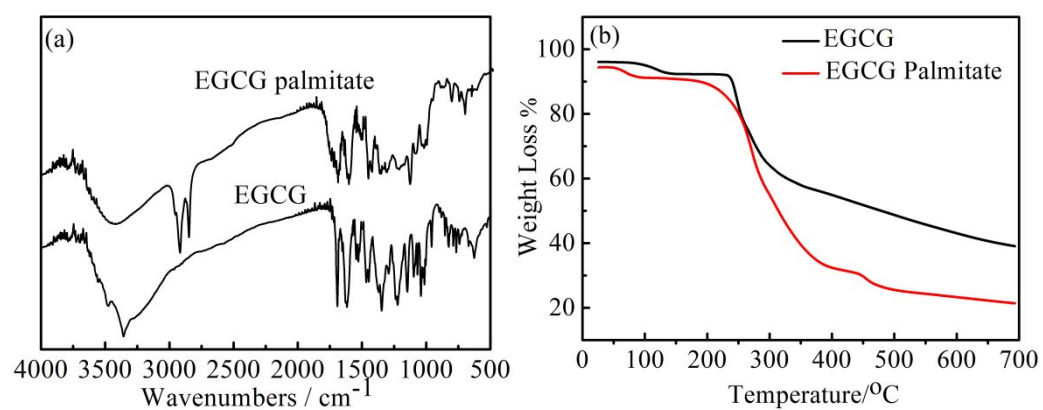

Figure S1 (a) IR spectra for EGCG and EGCG palmitate; (b) TGA curves for EGCG and EGCG plamitate;
